# Supplementary material for: A proposed terminology for the dentition of gomphodont cynodonts and dental morphology in Diademodontidae and Trirachodontidae
Source: PeerJ. 2019 Jun 13;7:e6752. doi: 10.7717/peerj.6752 (PMC6571134; doi:10.7717/peerj.6752)
Supplement: Supplemental Information 1 — Links to each of the 3d-models of non-traversodontid gomphodont postcanines downloadable on MorphoBrowser. [file peerj-07-6752-s001.xlsx]

## Sheet: Sheet1
class_name	order_name	family_name	genus_name	species_name	museum_id	upper_lower	left_right	perm_teeth	data_type	file_name	link
Cynodontia	Gomphodontia	Diademodontidae	Diademodon	tetragonus	SAM-PK-571	upper	right	PC1 to 3	psz file	Diademodon_Upper_SAM_571.psz	http://pantodon.science.helsinki.fi/morphobrowser/data/Gomphodontia/Diademodon_Upper_SAM_571.psz
Cynodontia	Gomphodontia	Diademodontidae	Diademodon	tetragonus	SAM-PK-571	upper	right	PC1 to 3	ply file	Diademodon_Upper_SAM_571.ply	http://pantodon.science.helsinki.fi/morphobrowser/morphoviews/Gomphodontia/Diademodon_Upper_SAM_571.ply
Cynodontia	Gomphodontia	Diademodontidae	Diademodon	tetragonus	SAM-PK-571	upper	right	PC?, distal gomphodont tooth	psz file	Diademodon_Upper_isolated_SAM_571.psz	http://pantodon.science.helsinki.fi/morphobrowser/data/Gomphodontia/Diademodon_Upper_isolated_SAM_571.psz
Cynodontia	Gomphodontia	Diademodontidae	Diademodon	tetragonus	SAM-PK-571	upper	right	PC?, distal gomphodont tooth	ply file	Diademodon_Upper_isolated_SAM_571.ply	http://pantodon.science.helsinki.fi/morphobrowser/morphoviews/Gomphodontia/Diademodon_Upper_isolated_SAM_571.ply
Cynodontia	Gomphodontia	Diademodontidae	Diademodon	tetragonus	SAM-PK-571	lower	left	PC?, distal gomphodont teeth	psz file	Diademodon_Lower_SAM_571.psz	http://pantodon.science.helsinki.fi/morphobrowser/data/Gomphodontia/Diademodon_Lower_SAM_571.psz
Cynodontia	Gomphodontia	Diademodontidae	Diademodon	tetragonus	SAM-PK-571	lower	left	PC?, distal gomphodont teeth	ply file	Diademodon_Lower_SAM_571.ply	http://pantodon.science.helsinki.fi/morphobrowser/morphoviews/Gomphodontia/Diademodon_Lower_SAM_571.ply
Cynodontia	Gomphodontia	Diademodontidae	Titanogomphodon	crassus	GSN R323	upper	left	PC?, three last gomphodont teeth	psz file	Titanogomphodon_Upper_GSN_322.psz	http://pantodon.science.helsinki.fi/morphobrowser/data/Gomphodontia/Titanogomphodon_Upper_GSN_322.psz
Cynodontia	Gomphodontia	Diademodontidae	Titanogomphodon	crassus	GSN R323	upper	left	PC?, three last gomphodont teeth	ply file	Titanogomphodon_Upper_GSN_322.ply	http://pantodon.science.helsinki.fi/morphobrowser/morphoviews/Gomphodontia/Titanogomphodon_Upper_GSN_322.ply
Cynodontia	Gomphodontia	Diademodontidae	Titanogomphodon	crassus	GSN R323	upper	right	PC?, two middle gomphodont teeth	psz file	Titanogomphodon_Upper2_GSN_322.psz	http://pantodon.science.helsinki.fi/morphobrowser/data/Gomphodontia/Titanogomphodon_Upper2_GSN_322.psz
Cynodontia	Gomphodontia	Diademodontidae	Titanogomphodon	crassus	GSN R323	upper	right	PC?, two middle gomphodont teeth	ply file	Titanogomphodon_Upper2_GSN_322.ply	http://pantodon.science.helsinki.fi/morphobrowser/morphoviews/Gomphodontia/Titanogomphodon_Upper2_GSN_322.ply
Cynodontia	Gomphodontia	Trirachodontidae	Langbergia	modisei	NMQR 3251	upper	left	PC5 to 6	psz file	Langbergia_Upper_NMQR_3251.psz	http://pantodon.science.helsinki.fi/morphobrowser/data/Gomphodontia/Langbergia_Upper_NMQR_3251.psz
Cynodontia	Gomphodontia	Trirachodontidae	Langbergia	modisei	NMQR 3251	upper	left	PC5 to 6	ply file	Langbergia_Upper_NMQR_3251.ply	http://pantodon.science.helsinki.fi/morphobrowser/morphoviews/Gomphodontia/Langbergia_Upper_NMQR_3251.ply
Cynodontia	Gomphodontia	Trirachodontidae	Langbergia	modisei	NMQR 3255	upper	left	PC1 to 2	psz file	Langbergia_Upper_NMQR_3255.psz	http://pantodon.science.helsinki.fi/morphobrowser/data/Gomphodontia/Langbergia_Upper_NMQR_3255.psz
Cynodontia	Gomphodontia	Trirachodontidae	Langbergia	modisei	NMQR 3255	upper	left	PC1 to 2	ply file	Langbergia_Upper_NMQR_3255.ply	http://pantodon.science.helsinki.fi/morphobrowser/morphoviews/Gomphodontia/Langbergia_Upper_NMQR_3255.ply
Cynodontia	Gomphodontia	Trirachodontidae	Langbergia	modisei	NMQR 3251	lower	right	PC3 to 5	psz file	Langbergia_Lower_NMQR_3251.psz	http://pantodon.science.helsinki.fi/morphobrowser/data/Gomphodontia/Langbergia_Lower_NMQR_3251.psz
Cynodontia	Gomphodontia	Trirachodontidae	Langbergia	modisei	NMQR 3251	lower	right	PC3 to 5	ply file	Langbergia_Lower_NMQR_3251.ply	http://pantodon.science.helsinki.fi/morphobrowser/morphoviews/Gomphodontia/Langbergia_Lower_NMQR_3251.ply
Cynodontia	Gomphodontia	Trirachodontidae	Cricodon	metabolus	UMZC T905 (now at the NHM, uncatalogued)	upper	right	PC?, last two gomphodont teeth	psz file	Cricodon_metabolus_Upper_UMCZ_T905.psz	http://pantodon.science.helsinki.fi/morphobrowser/data/Gomphodontia/Cricodon_metabolus_Upper_UMCZ_T905.psz
Cynodontia	Gomphodontia	Trirachodontidae	Cricodon	metabolus	UMZC T905 (now at the NHM, uncatalogued)	upper	right	PC?, last two gomphodont teeth	ply file	Cricodon_metabolus_Upper_UMCZ_T905.ply	http://pantodon.science.helsinki.fi/morphobrowser/morphoviews/Gomphodontia/Cricodon_metabolus_Upper_UMCZ_T905.ply
Cynodontia	Gomphodontia	Trirachodontidae	Cricodon	metabolus	UMZC T905 (now at the NHM, uncatalogued)	lower	right	PC8	psz file	Cricodon_metabolus_Lower1_UMCZ_T905.psz	http://pantodon.science.helsinki.fi/morphobrowser/data/Gomphodontia/Cricodon_metabolus_Lower1_UMCZ_T905.psz
Cynodontia	Gomphodontia	Trirachodontidae	Cricodon	metabolus	UMZC T905 (now at the NHM, uncatalogued)	lower	right	PC8	ply file	Cricodon_metabolus_Lower1_UMCZ_T905.ply	http://pantodon.science.helsinki.fi/morphobrowser/morphoviews/Gomphodontia/Cricodon_metabolus_Lower1_UMCZ_T905.ply
Cynodontia	Gomphodontia	Trirachodontidae	Cricodon	metabolus	UMZC T905 (now at the NHM, uncatalogued)	lower	right	PC9	psz file	Cricodon_metabolus_Lower2_UMCZ_T905.psz	http://pantodon.science.helsinki.fi/morphobrowser/data/Gomphodontia/Cricodon_metabolus_Lower2_UMCZ_T905.psz
Cynodontia	Gomphodontia	Trirachodontidae	Cricodon	metabolus	UMZC T905 (now at the NHM, uncatalogued)	lower	right	PC9	ply file	Cricodon_metabolus_Lower2_UMCZ_T905.ply	http://pantodon.science.helsinki.fi/morphobrowser/morphoviews/Gomphodontia/Cricodon_metabolus_Lower2_UMCZ_T905.psz
Cynodontia	Gomphodontia	Trirachodontidae	Cricodon	metabolus	NHM PV R36800	lower	right	PC?, third and second last gomphodont teeth	psz file	Cricodon_Lower_NHM_PV_R36800.psz	http://pantodon.science.helsinki.fi/morphobrowser/data/Gomphodontia/Cricodon_Lower_NHM_PV_R36800.psz
Cynodontia	Gomphodontia	Trirachodontidae	Cricodon	metabolus	NHM PV R36800	lower	right	PC?, third and second last gomphodont teeth	ply file	Cricodon_Lower_NHM_PV_R36800.ply	http://pantodon.science.helsinki.fi/morphobrowser/morphoviews/Gomphodontia/Cricodon_Lower_NHM_PV_R36800.ply
Cynodontia	Gomphodontia	Trirachodontidae	Trirachodon	berryi	BP/1/4658	lower	left	PC5 to 7, three last gomphodont teeth	psz file	Trirachodon__kannemeyeri__Lower_BP_4658.psz	http://pantodon.science.helsinki.fi/morphobrowser/data/Gomphodontia/Trirachodon__kannemeyeri__Lower_BP_4658.psz
Cynodontia	Gomphodontia	Trirachodontidae	Trirachodon	berryi	BP/1/4658	lower	left	PC5 to 7, three last gomphodont teeth	ply file	Trirachodon__kannemeyeri__Lower_BP_4658.ply	http://pantodon.science.helsinki.fi/morphobrowser/morphoviews/Gomphodontia/Trirachodon__kannemeyeri__Lower_BP_4658.ply
Cynodontia	Gomphodontia	Trirachodontidae	Trirachodon	berryi	SAM-PK-K4801	upper	right	PC?, three last gomphodont teeth	psz file	Trirachodon__kannemeyeri__Upper_SAM_K4801.psz	http://pantodon.science.helsinki.fi/morphobrowser/data/Gomphodontia/Trirachodon__kannemeyeri__Upper_SAM_K4801.psz
Cynodontia	Gomphodontia	Trirachodontidae	Trirachodon	berryi	SAM-PK-K4801	upper	right	PC?, three last gomphodont teeth	ply file	Trirachodon__kannemeyeri__Upper_SAM_K4801.ply	http://pantodon.science.helsinki.fi/morphobrowser/morphoviews/Gomphodontia/Trirachodon__kannemeyeri__Upper_SAM_K4801.ply
Cynodontia	Gomphodontia	Trirachodontidae	Trirachodon	berryi	SAM-PK-K4801	lower	right	PC?, second last gomphodont tooth	psz file	Trirachodon__kannemeyeri__Lower_SAM_K4801.psz	http://pantodon.science.helsinki.fi/morphobrowser/data/Gomphodontia/Trirachodon__kannemeyeri__Lower_SAM_K4801.psz
Cynodontia	Gomphodontia	Trirachodontidae	Trirachodon	berryi	SAM-PK-K4801	lower	right	PC?, second last gomphodont tooth	ply file	Trirachodon__kannemeyeri__Lower_SAM_K4801.ply	http://pantodon.science.helsinki.fi/morphobrowser/morphoviews/Gomphodontia/Trirachodon__kannemeyeri__Lower_SAM_K4801.ply
Cynodontia	Gomphodontia	Trirachodontidae	Trirachodon	berryi	SAM-PK-K4801	lower	right	PC?, last gomphodont tooth	psz file	Trirachodon__kannemeyeri__Lower2_SAM_K4801.psz	http://pantodon.science.helsinki.fi/morphobrowser/data/Gomphodontia/Trirachodon__kannemeyeri__Lower2_SAM_K4801.psz
Cynodontia	Gomphodontia	Trirachodontidae	Trirachodon	berryi	SAM-PK-K4801	lower	right	PC?, last gomphodont tooth	ply file	Trirachodon__kannemeyeri__Lower2_SAM_K4801.ply	http://pantodon.science.helsinki.fi/morphobrowser/morphoviews/Gomphodontia/Trirachodon__kannemeyeri__Lower2_SAM_K4801.ply
Cynodontia	Gomphodontia	Trirachodontidae	Trirachodon	berryi	SAM-PK-K171	upper	right	PC3 to 6	psz file	Trirachodon__kannemeyeri__Upper_SAM_K171.psz	http://pantodon.science.helsinki.fi/morphobrowser/data/Gomphodontia/Trirachodon__kannemeyeri__Upper_SAM_K171.psz
Cynodontia	Gomphodontia	Trirachodontidae	Trirachodon	berryi	SAM-PK-K171	upper	right	PC3 to 6	ply file	Trirachodon__kannemeyeri__Upper_SAM_K171.ply	http://pantodon.science.helsinki.fi/morphobrowser/morphoviews/Gomphodontia/Trirachodon__kannemeyeri__Upper_SAM_K171.ply
Cynodontia	Gomphodontia	Trirachodontidae	Trirachodon	berryi	SAM-PK-K171	lower	right	PC3 to 6	psz file	Trirachodon__kannemeyeri__Lower_SAM_K171.psz	http://pantodon.science.helsinki.fi/morphobrowser/data/Gomphodontia/Trirachodon__kannemeyeri__Lower_SAM_K171.psz
Cynodontia	Gomphodontia	Trirachodontidae	Trirachodon	berryi	SAM-PK-K171	lower	right	PC3 to 6	ply file	Trirachodon__kannemeyeri__Lower_SAM_K171.ply	http://pantodon.science.helsinki.fi/morphobrowser/morphoviews/Gomphodontia/Trirachodon__kannemeyeri__Lower_SAM_K171.ply
Cynodontia	Gomphodontia	Trirachodontidae	Trirachodon	berryi	NHM R3307	upper	left	PC?, last three gomphodont teeth	psz file	Trirachodon__kannemeyeri__Upper_NHM_R3307.psz	http://pantodon.science.helsinki.fi/morphobrowser/data/Gomphodontia/Trirachodon__kannemeyeri__Upper_NHM_R3307.psz
Cynodontia	Gomphodontia	Trirachodontidae	Trirachodon	berryi	NHM R3307	upper	left	PC?, last three gomphodont teeth	ply file	Trirachodon__kannemeyeri__Upper_NHM_R3307.ply	http://pantodon.science.helsinki.fi/morphobrowser/morphoviews/Gomphodontia/Trirachodon__kannemeyeri__Upper_NHM_R3307.ply
Cynodontia	Gomphodontia	Trirachodontidae	Trirachodon	berryi	BSP 1934 VIII 21	upper	left	PC10 to 12, last three gomphodont teeth	psz file	Trirachodon_berryi_Upper_BS_1934_VIII_21.psz	http://pantodon.science.helsinki.fi/morphobrowser/data/Gomphodontia/Trirachodon_berryi_Upper_BS_1934_VIII_21.psz
Cynodontia	Gomphodontia	Trirachodontidae	Trirachodon	berryi	BSP 1934 VIII 21	upper	left	PC10 to 12, last three gomphodont teeth	ply file	Trirachodon_berryi_Upper_BS_1934_VIII_21.ply	http://pantodon.science.helsinki.fi/morphobrowser/morphoviews/Gomphodontia/Trirachodon_berryi_Upper_BS_1934_VIII_21.ply
